# Supplementary material
Source: PubMed Central journal article supplement (PMC10992977)
Supplement: 262_2021_2874_MOESM1_ESM.pdf [file 262_2021_2874_MOESM1_ESM.pdf]

### List of the fluorochrome-labeled monoclonal antibodies used for flow cytometry

| Antigen      | Fluorochrome    | Clone     | Producer       |
|--------------|-----------------|-----------|----------------|
| CD3          | FITC            | OKT3      | eBioscience    |
| CD3          | AmCyan          | SK7       | BD Biosciences |
| CD4          | PE/Dazzle 594   | OKT4      | Biolegend      |
| CD4          | PeCy 7          | RPA-T4    | eBioscience    |
| CD8          | PeDylight 594   | MEM-31    | Exbio          |
| CD14         | FITC            | MEM-15    | Exbio          |
| CD16         | FITC            | LNK16     | Exbio          |
| CD19         | FITC            | LT19      | Exbio          |
| CD20         | FITC            | LT20      | Exbio          |
| CD20         | Alefa Fluor 700 | 2H7       | Exbio          |
| CD25         | Alexa Fluor 700 | M-A251    | Biolegend      |
| CD28         | PeCy 7          | CD28.2    | Biolegend      |
| CD45         | Alexa Fluor 700 | HI30      | Biolegend      |
| CD45         | PeCy 7          | HI30      | Biolegend      |
| CD56         | FITC            | MEM-188   | Exbio          |
| CD123        | APC             | 6H6       | Biolegend      |
| CD127        | Alexa Fluor 647 | A019D5    | Biolegend      |
| BDCA-2       | PerCP-Cy 5.5    | 201A      | Biolegend      |
| Granzyme B   | Alexa Fluor 700 | GB11      | BD Biosciences |
| FoxP3        | Alexa Fluor 488 | 259D/C7   | BD Biosciences |
| IDO          | PeCy7           | eyedio    | eBioscience    |
| IFN $\alpha$ | PE              | 7N4-1     | BD Biosciences |
| NKp44        | Pacific Blue    | 44.189    | eBiosciences   |
| TIM-3        | PeCy 7          | F38-2E2   | Biolegend      |
| TLR 7        | PE              | 533707    | R&D systems    |
| TLR 9        | PE              | eB72-1665 | BD Biosciences |
| TRAIL        | PE              | RIK-2     | Biolegend      |

Figure S1

**A**

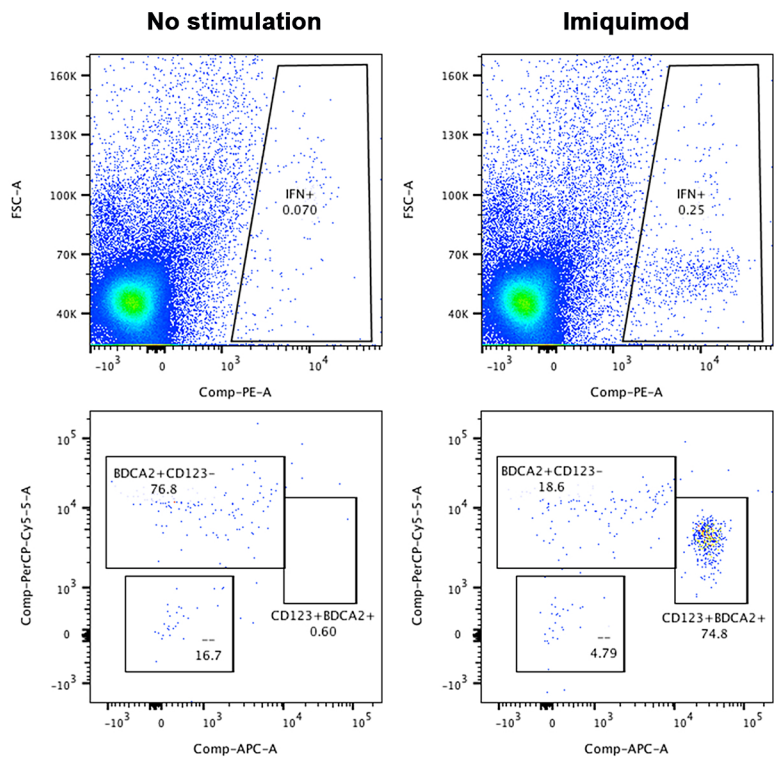

**B**

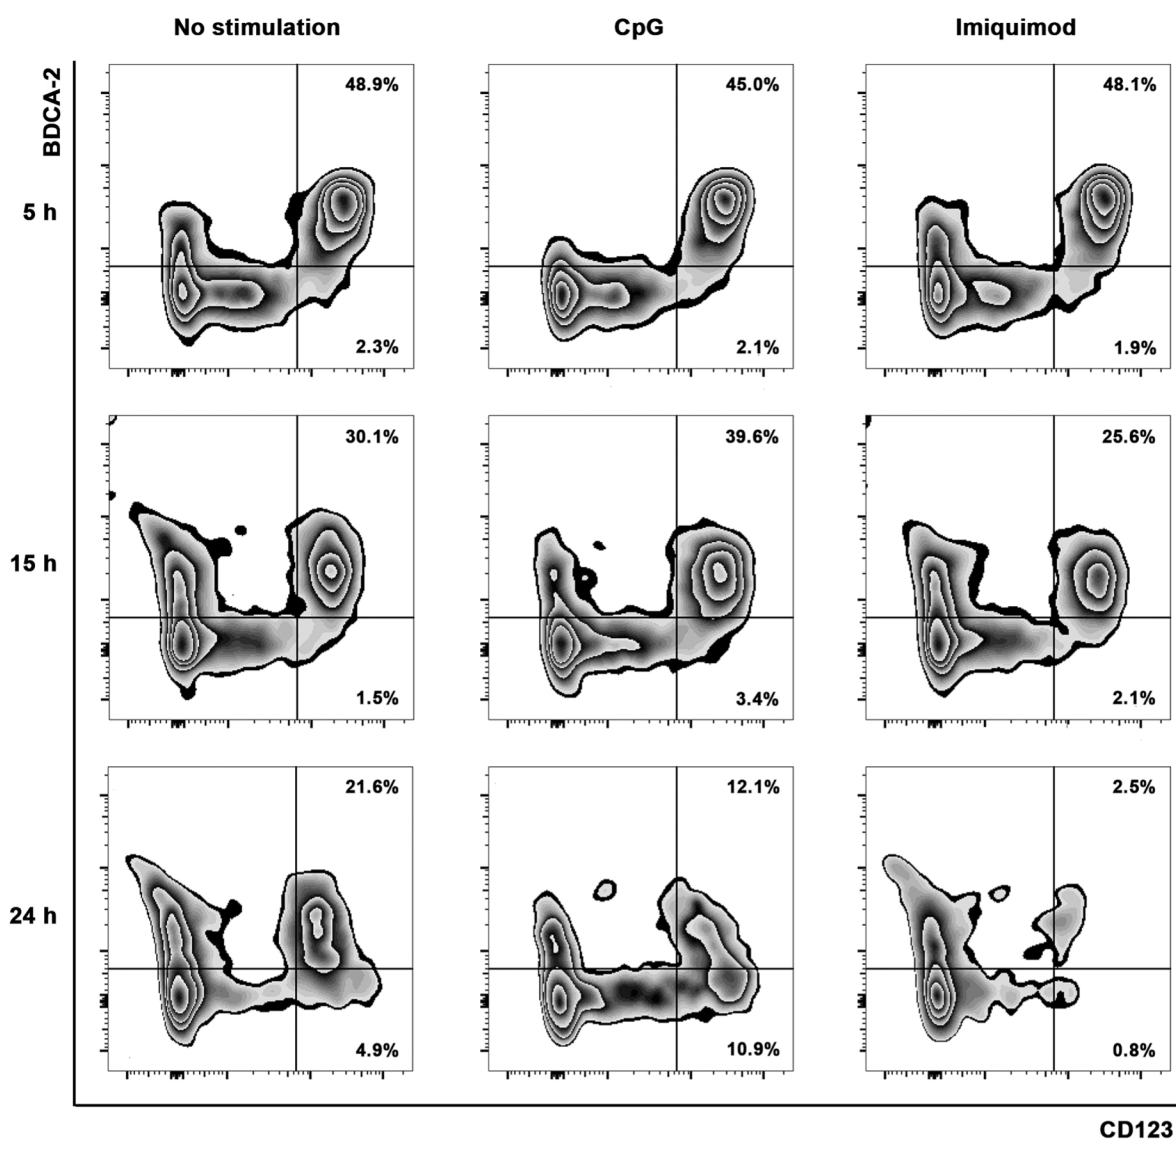

**Figure S1:** (A) Detection of IFN $\alpha$ <sup>+</sup> cells in tumor-derived single cell suspension upon imiquimod stimulation in a representative patient. (B) Flow cytometric analysis of pDC proportions in freshly resected tissue of HNSCC depending on the chosen TLR agonist (CpG, IMQ) and length of the stimulation. Zebra plots of a representative sample show changes in pDC frequency with respect to time and treatment. Cells were gated on CD45<sup>+</sup>Lin<sup>-</sup>CD4<sup>+</sup> cells.
